# Supplementary material for: Temporal and spatial trends in gastric cancer burden in the USA from 1990 to 2021: findings from the global burden of disease study 2021
Source: Front Oncol. 2024 Dec 18;14:1499384. doi: 10.3389/fonc.2024.1499384 (PMC11688243; doi:10.3389/fonc.2024.1499384)
Supplement: Supplementary file 5 [file Table5.xlsx]

## Sheet: Sheet 1
Supplement Table S5.Detailed results of the decomposition analysis for gastric cancer incidence.
Location	Overll difference	Aging(%)	Population(%)	Epidemiological change
Massachusetts	-191.35	222.44 (-116.25%)	109.13 (-57.03%)	-522.92 (273.28%)
Connecticut	-83.53	131.54 (-157.48%)	28.05 (-33.58%)	-243.12 (291.06%)
Delaware	27.82	36.19 (130.11%)	31.6 (113.61%)	-39.98 (-143.72%)
Missouri	27.01	126.51 (468.42%)	81.8 (302.9%)	-181.3 (-671.32%)
Rhode Island	-38.61	35.24 (-91.25%)	9.81 (-25.4%)	-83.66 (216.65%)
Hawaii	24.96	111.86 (448.21%)	53.89 (215.92%)	-140.79 (-564.13%)
South Carolina	165.68	179.18 (108.15%)	152.77 (92.21%)	-166.27 (-100.36%)
New Jersey	-246.45	307.55 (-124.8%)	178.74 (-72.53%)	-732.75 (297.32%)
Arizona	252.9	155.07 (61.32%)	300.5 (118.82%)	-202.66 (-80.14%)
Utah	66.57	41.19 (61.88%)	83.88 (126.01%)	-58.5 (-87.88%)
Kansas	-4.36	47 (-1078.63%)	34.08 (-782.1%)	-85.43 (1960.73%)
Wisconsin	-43.93	172.22 (-392.02%)	91.08 (-207.31%)	-307.23 (699.33%)
Ohio	-157.02	357.46 (-227.65%)	68.64 (-43.71%)	-583.12 (371.36%)
Alabama	48.22	137.67 (285.49%)	93.16 (193.19%)	-182.61 (-378.68%)
Indiana	37.74	139.8 (370.45%)	91.15 (241.52%)	-193.21 (-511.97%)
Virginia	172.25	266.99 (155%)	206.68 (119.99%)	-301.42 (-174.99%)
Washington	122.21	190.85 (156.16%)	234.19 (191.63%)	-302.83 (-247.79%)
Michigan	-87.49	399.65 (-456.78%)	56.52 (-64.6%)	-543.66 (621.38%)
Louisiana	-8.09	171.75 (-2123.74%)	38.79 (-479.63%)	-218.63 (2703.37%)
New York	-247.93	625.73 (-252.38%)	207.21 (-83.58%)	-1080.88 (435.96%)
California	1002.5	1231.96 (122.89%)	796.08 (79.41%)	-1025.53 (-102.3%)
North Carolina	251.68	255.91 (101.68%)	325.31 (129.26%)	-329.54 (-130.94%)
District of Columbia	-30.73	7.31 (-23.78%)	8.8 (-28.64%)	-46.84 (152.41%)
Minnesota	30.35	147.44 (485.87%)	117.79 (388.16%)	-234.89 (-774.03%)
Florida	352.43	338.71 (96.11%)	893.08 (253.4%)	-879.36 (-249.51%)
Oregon	66.34	105.94 (159.69%)	116.98 (176.32%)	-156.58 (-236.01%)
Montana	15.05	32.31 (214.67%)	24.34 (161.74%)	-41.6 (-276.41%)
Nebraska	-10.06	27.4 (-272.33%)	30.57 (-303.9%)	-68.03 (676.22%)
Nevada	122.99	65.83 (53.52%)	155.13 (126.13%)	-97.96 (-79.65%)
Tennessee	119.13	151.32 (127.02%)	167.91 (140.95%)	-200.1 (-167.97%)
Idaho	39.89	30.07 (75.37%)	57.81 (144.91%)	-47.98 (-120.28%)
Illinois	-110.79	375.64 (-339.05%)	108.21 (-97.67%)	-594.65 (536.71%)
Colorado	148.27	143.7 (96.92%)	188.19 (126.92%)	-183.62 (-123.84%)
Pennsylvania	-419.23	381.22 (-90.93%)	102.63 (-24.48%)	-903.07 (215.41%)
Mississippi	19.95	83.26 (417.25%)	32.16 (161.16%)	-95.46 (-478.41%)
Texas	806.56	586.74 (72.75%)	1003.75 (124.45%)	-783.92 (-97.19%)
Georgia	354.05	305.36 (86.25%)	389.95 (110.14%)	-341.26 (-96.39%)
Alaska	30.12	42.42 (140.85%)	12.78 (42.44%)	-25.08 (-83.29%)
New Hampshire	13.52	60.93 (450.74%)	23.03 (170.33%)	-70.44 (-521.07%)
Iowa	-20.65	47.72 (-231.06%)	30.2 (-146.22%)	-98.56 (477.27%)
West Virginia	-26.82	57.09 (-212.89%)	-4.8 (17.91%)	-79.11 (294.98%)
North Dakota	-16.73	13.77 (-82.32%)	13.17 (-78.68%)	-43.67 (260.99%)
Maine	4.56	66.33 (1453.53%)	11.48 (251.67%)	-73.25 (-1605.21%)
Maryland	49.8	214.62 (430.92%)	124.17 (249.32%)	-288.99 (-580.24%)
New Mexico	77.49	89.1 (114.98%)	56.96 (73.51%)	-68.57 (-88.49%)
South Dakota	-4.47	15.09 (-337.69%)	15.95 (-356.73%)	-35.51 (794.42%)
Arkansas	4.42	48.62 (1100.84%)	60.1 (1360.66%)	-104.3 (-2361.5%)
Kentucky	38.68	123.71 (319.83%)	73.93 (191.14%)	-158.97 (-410.97%)
Vermont	4.14	27.72 (669.45%)	5.75 (138.96%)	-29.33 (-708.41%)
Oklahoma	-10.71	61.52 (-574.61%)	64.64 (-603.72%)	-136.87 (1278.33%)
Wyoming	9.29	17.9 (192.71%)	8.46 (91.12%)	-17.07 (-183.83%)
